# Supplementary material for: Overlapping mouse subcongenic strains successfully separate two linked body fat QTL on distal MMU 2
Source: PubMed Central journal article supplement (PMC4308015; doi:10.1186/s12864-014-1191-8), 2015-01-23
Supplement: 12864_2014_1191_MOESM3_ESM.pdf [file 12864_2014_1191_MOESM3_ESM.pdf]

Additional Table 1. HG.CAST 2D subcongenic strains developed and their corresponding microsatellite and SNP markers, and PCR conditions.

| Strain         | Microsatellite | [MgCl <sub>2</sub> ] mM | Location   |      | Source    |
|----------------|----------------|-------------------------|------------|------|-----------|
|                |                |                         | Mb         | cM   |           |
| HG2D-1         | D2Mit185       | 2.0                     | 105.335860 | 47.5 | MIT       |
| HG2D-1         | D2Mit58        | 2.0                     | 108.099851 | 51.4 | MIT       |
| HG2D-1         | D2Mit101       | 2.0                     | 114.905325 | 52.5 | MIT       |
| HG2D-2         | D2Mit420       | 2.0                     | 118.203953 | 54.6 | MIT       |
| HG2D-2         | D2Mit107       | 2.0                     | 133.061498 | 61.2 | MIT       |
| HG2D-2         | D2Mit490       | 2.0                     | 138.721284 | 64.5 | MIT       |
| HG2D-3         | D2Mit194       | 2.0                     | 143.757317 | 81.4 | MIT       |
| HG2D-3         | rs27273819     |                         | 145.506914 |      | Perlegen2 |
| HG2D-3         | rs27325361     |                         | 147.258580 |      | Perlegen2 |
| HG2D-3         | D2Mit260       | 1.5                     | 149.008060 | 83   | MIT       |
| HG2D-3         | rs27372237     |                         | 150.007335 |      | Perlegen2 |
| HG2D-3         | rs27350314     |                         | 150.998686 |      | Perlegen2 |
| HG2D-3, and -4 | rs27385876     |                         | 151.669008 |      | Perlegen2 |
| HG2D-3, and -4 | rs27343750     |                         | 152.330044 |      | Perlegen2 |
| HG2D-3, and -4 | rs27352724     |                         | 152.991660 |      | Perlegen2 |
| HG2D-3, and -4 | rs27343642     |                         | 153.649790 |      | Perlegen2 |
| HG2D-3, and -4 | D2Mit286       | 2.0                     | 154.338414 | 87.0 | MIT       |
| HG2D-3, and -4 | rs27365903     |                         | 154.312195 |      | Perlegen2 |
| HG2D-3, and -4 | rs27326115     |                         | 154.978855 |      | Perlegen2 |
| HG2D-3, and -4 | D2Mit262       | 2.0                     | 155.693206 | 87.0 | MIT       |
| HG2D-3, and -4 | rs27323847     |                         | 155.643661 |      | Perlegen2 |
| HG2D-3, and -4 | rs27321848     |                         | 156.305388 |      | Perlegen2 |
| HG2D-3, and -4 | rs27307998     |                         | 156.976171 |      | Perlegen2 |
| HG2D-3, and -4 | rs27358422     |                         | 157.638649 |      | Perlegen2 |
| HG2D-3, and -4 | rs27319627     |                         | 158.299081 |      | Perlegen2 |
| HG2D-3, and -4 | rs27306308     |                         | 158.858393 |      | Perlegen2 |
| HG2D-3, and -4 | rs27335891     |                         | 159.621255 |      | Perlegen2 |
| HG2D-4         | D2Mit196       | 2.0                     | 160.286752 | 92.0 | MIT       |
| HG2D-4         | rs28279021     |                         | 161.056198 |      | Perlegen2 |
| HG2D-4         | rs27317780     |                         | 161.808146 |      | Perlegen2 |
| HG2D-4         | rs28280230     |                         | 162.568440 |      | Perlegen2 |
| HG2D-4         | rs16787600     |                         | 163.332178 |      | Perlegen2 |
| HG2D-4         | rs27300434     |                         | 163.923855 |      | Perlegen2 |
| HG2D-4         | rs28240341     |                         | 164.844700 |      | Perlegen2 |
| HG2D-4         | rs27330151     |                         | 165.615450 |      | Perlegen2 |
| HG2D-4         | rs27298803     |                         | 166.381247 |      | Perlegen2 |
| HG2D-4         | rs27290252     |                         | 167.106665 |      | Perlegen2 |
| HG2D-4         | rs27322351     |                         | 167.891803 |      | Perlegen2 |
| HG2D-4         | rs27288813     |                         | 168.459905 |      | Perlegen2 |
| HG2D-4, and -5 | D2Mit456       | 1.5                     | 168.761938 | 86.3 | MIT       |
| HG2D-4, and -5 | rs27340088     |                         | 169.001154 |      | Perlegen2 |
| HG2D-4, and -5 | rs27622165     |                         | 169.568797 |      | Perlegen2 |
| HG2D-4, and -5 | rs6233743      |                         | 170.120252 |      | Perlegen2 |

| <i>Strain</i>           | <i>Microsatellite</i> | <i>[MgCl<sub>2</sub>] mM</i> | <i>Location</i> |           | <i>Source</i> |
|-------------------------|-----------------------|------------------------------|-----------------|-----------|---------------|
|                         |                       |                              | <i>Mb</i>       | <i>cM</i> |               |
| <i>HG2D-4, and -5</i>   | <i>rs27618585</i>     |                              | 170.675178      |           | Perlegen2     |
| <i>HG2D-4, and -5</i>   | <i>rs28289712</i>     |                              | 171.240389      |           | Perlegen2     |
| <i>HG2D-4, and -5</i>   | <i>rs27289118</i>     |                              | 171.786730      |           | Perlegen2     |
| <i>HG2D-4, and -5</i>   | <i>rs27631793</i>     |                              | 172.345636      |           | Perlegen2     |
| <i>HG2D-4, and -5</i>   | <i>rs27646938</i>     |                              | 172.888191      |           | Perlegen2     |
| <i>HG2D-4, and -5</i>   | <i>rs27644321</i>     |                              | 173.450373      |           | Perlegen2     |
| <i>HG2D-4, and -5</i>   | <i>rs27669516</i>     |                              | 174.011386      |           | Perlegen2     |
| <i>HG2D-4, and -5</i>   | <i>D2Mit213</i>       | 1.5                          | 174.372768      | 105.0     | MIT           |
| <i>HG2D-4, and -5</i>   | <i>rs27623944</i>     |                              | 174.559892      |           | Perlegen2     |
| <i>HG2D-4, and -5</i>   | <i>rs27634370</i>     |                              | 175.001750      |           | Perlegen2     |
| <i>HG2D-4, and -5</i>   | <i>UCDSNP2</i>        |                              | 176.595657      |           | UC Davis      |
| <i>HG2D-4, and -5</i>   | <i>rs27650182</i>     |                              | 176.860174      |           | Perlegen2     |
| <i>HG2D-4, and -5</i>   | <i>rs27650079</i>     |                              | 177.339866      |           | Perlegen2     |
| <i>HG2D-4, and -5</i>   | <i>rs27652370</i>     |                              | 177.890297      |           | Perlegen2     |
| <i>HG2D-4, and -5</i>   | <i>rs27703094</i>     |                              | 178.449714      |           | Perlegen2     |
| <i>HG2D-5</i>           | <i>D2Mit148</i>       | 1.5                          | 178.535307      | 105.0     | MIT           |
| <i>Outside congenic</i> | <i>rs27683474</i>     |                              | 179.000149      |           | Perlegen2     |
| <i>Outside congenic</i> | <i>rs27648414</i>     |                              | 179.546670      |           | Broad1        |
| <i>Outside congenic</i> | <i>rs27681748</i>     |                              | 180.104819      |           | Perlegen2     |
