# Supplementary material for: Overlapping mouse subcongenic strains successfully separate two linked body fat QTL on distal MMU 2
Source: PubMed Central journal article supplement (PMC4308015; doi:10.1186/s12864-014-1191-8), 2015-01-23
Supplement: 12864_2014_1191_MOESM4_ESM.pdf [file 12864_2014_1191_MOESM4_ESM.pdf]

Additional Table 2. Real Time PCR primers for differential expression with SYBR Green.

| <b>Name</b>   | <b>Orientation</b> | <b>Sequence</b>            | <b>Fragment Size</b> | <b>Accession No.</b> |
|---------------|--------------------|----------------------------|----------------------|----------------------|
| <i>Atp5e</i>  | <i>F</i>           | ACTTCGGGCAGCAGCATAA        | 95                   | NM_025983.3          |
|               | <i>R</i>           | CCCACATGCTTCACCTTCAA       |                      |                      |
| <i>Ctsz</i>   | <i>F</i>           | AGTACTGGATTGTCCGAAATTCATG  | 91                   | NM_022325.4          |
|               | <i>R</i>           | ACCTGTGCTCCCTTGTAGGT       |                      |                      |
| <i>Gnas</i>   | <i>F</i>           | CAAGGAGCAACAGCGATGGT       | 92                   | NM_022000.2          |
|               | <i>R</i>           | TCATGGCGGCCACAATG          |                      |                      |
| <i>Rab22a</i> | <i>F</i>           | CACTGGACGCCACCTCATG        | 127                  | NM_024436.2          |
|               | <i>R</i>           | CCCTTTGCACGCCAGAGT         |                      |                      |
| <i>Stx16</i>  | <i>F</i>           | CGTGTGAATACGTGCTTTAGTGAA   | 111                  | NM_172675.2          |
|               | <i>R</i>           | TTTAACATGCTGCTCAGACATTAGTG |                      |                      |
| <i>Gus</i> *  | <i>F</i>           | GTATGGAGCAGACGCAATCC       | 134                  | NM_010368            |
|               | <i>R</i>           | GCTCTCCGACCACGTATTCT       |                      |                      |
| <i>SDHA</i> * | <i>F</i>           | CGGCAAATCTCAACTTGTC A      | 131                  | XM_127445            |
|               | <i>R</i>           | CCTTGTAGTCTTTGGCAGAGC      |                      |                      |

\* (Wong 2004)
